# Supplementary material for: EARice10: A 10 m Resolution Annual Rice Distribution Map of East Asia for 2023
Source: Copernicus journal article supplement (doi:10.5194/essd-2024-331), 2024-08-28
Supplement: Supplementary file [file essd-2024-331-AC2-supplement.pdf]

Dear Reviewers,

Manuscript ID *essd-2024-331* entitled “A 10 m Resolution Annual Rice Distribution Map of East Asia for 2023.”

We would like to express our sincere gratitude to the editor and both reviewers for their constructive feedback and thorough review of our manuscript. We have carefully considered all suggestions and have made the corresponding revisions to the manuscript. In addition to addressing the reviewers' comments, we have also refined the overall language to enhance the quality of the paper, and redrawn some of the figures for greater clarity. Below, we provide detailed responses to each of the reviewers' comments, including clarifications where necessary. We hope these revisions address the concerns and uncertainties raised by the reviewers. In the manuscript and this file, the **blue** parts are revisions suggested by the reviewer 1, **green** parts for suggestions of reviewer 2 are highlighted in green, and to improve the readability and overall quality of the paper, additional modifications are marked in **red**.

Sincerely,

Zhang Hong

zhanghong@radi.ac.cn

## **Response to Reviewer 2**

### **Comments to the Author**

**This paper maps rice paddy distribution of East Asia countries in 2023 at 10m resolution (EARice10), a timely and accurate product (according to the assessment) that is useful for estimating greenhouse gas emissions and grain yield. The method integrates both Sentinel-2 Optical and Sentinel-1 SAR data. The manuscript is generally well-written, with high-quality figures. However, I have a few concerns that I hope will help improve the manuscript.**

**RESPONSE:** Thank you very much for your appreciation of our work. Your suggestions have helped us a lot to improve the quality of our manuscript.

### **1. Validation of Data**

**The independent validation samples (91,320) are said to be obtained through field surveys and visual interpretations. How many of these samples were obtained through field surveys?**

**RESPONSE:** Thank you very much for your comment. Due to space limitations, we only briefly mentioned in the manuscript that the independent validation samples were obtained through field surveys and visual interpretation. In response to this concern, we provide a more detailed explanation here regarding the construction of the independent validation sample set.

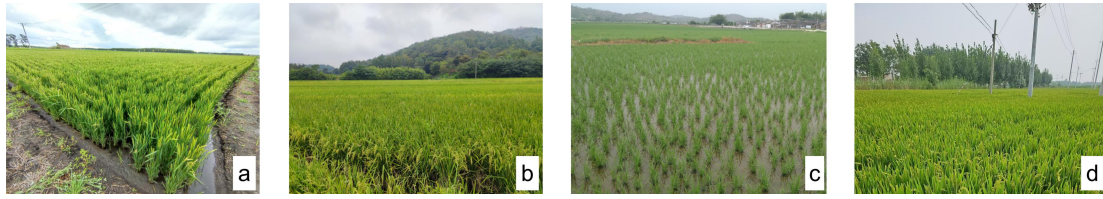

**Figure R2-1. Field survey photos of rice paddies in different regions: (a) Heilongjiang; (b) Anhui; (c) Guangdong; (d) Tianjin.**

To evaluate the reliability of EARice10, we constructed an independent validation sample set consisting of 91,320 samples (covering a total of 4,384 rice and non-rice plots), spanning four East Asian countries (China, Japan, the Democratic People's Republic of Korea, and the Republic of Korea). Of these, 57,486 samples were collected in China, 15,834 in Japan, and 9,000 each in the Democratic People's Republic of Korea and the Republic of Korea. Due to varying accessibility across countries, different sampling strategies were employed. For China, we used a combination of field surveys and visual interpretation to collect validation samples. We conducted field surveys in China's major rice production areas, as shown in Figure R2-1. Through these field surveys, a total of 10,548 field samples (517 plots) were collected, including 5,346 rice samples (261 plots) and 5,202 non-rice samples (256 plots), accounting for 18.35% of the total samples in China and 11.56% of the total samples across East Asia. In Japan, the Democratic People's Republic of Korea, and the Republic of Korea, where field surveys were not feasible, we employed visual interpretation and cross-validation using multiple data sources to obtain validation samples.

Visual interpretation is a widely used method in remote sensing, particularly in cases where field surveys are not possible (Huang et al., 2023; Zhang et al., 2023; Li et al., 2024a; Li et al., 2024b). Before conducting visual interpretation, we utilized various reference materials for the study area, including news reports, statistical yearbooks, and land use and land cover data. These resources provided valuable background information, enabling us to more accurately determine the overall distribution of rice in the study area. Based on this prior knowledge, we implemented strict guidelines for

visual interpretation through cross-validation with multiple data sources to ensure accuracy and robustness. The primary data sources used include:

**(1) Sentinel-2 imagery from 2023:**

Numerous studies have shown that during specific rice growth periods, false-color composite images can effectively distinguish rice from other crops (Zhang et al., 2023; Li et al., 2024a; Li et al., 2024b). The "soil-water-vegetation" characteristics of rice paddies during the transplanting period exhibit distinct spectral features. Using SWIR (B11), NIR (B8), and Red (B4) band combinations to generate false-color composite images, rice paddies can be clearly differentiated from other crops (as shown in the left column of Figure R2-2). Generally, during the rice transplanting period, the surface of rice paddies is mostly submerged, resulting in low spectral values in the SWIR and NIR bands, appearing as dark green features in false-color composite images, while other crops typically appear red or brown.

**(2) Google high-resolution satellite imagery:**

In Google high-resolution satellite imagery, rice paddies in East Asia typically appear as regular small grid-like plots due to the high irrigation requirements of rice, which are not characteristic of other dryland crops (Zhao et al., 2021; Li et al., 2024b). Although Google high-resolution satellite imagery is often historical, the annual variation in large rice-growing areas is relatively small. Therefore, it serves as a useful reference for distinguishing rice from other crops (as shown in the middle column of Figure R2-2).

**(3) Historical rice distribution maps:**

As mentioned earlier, rice-growing areas tend to remain relatively stable due to the high irrigation requirements of rice in East Asia. Hence, historical rice distribution maps for the study area can serve as an effective means of identifying rice distribution (as shown in the right column of Figure R2-2).

By combining multiple data sources, we were able to significantly improve the

accuracy and reliability of the independent validation sample set obtained through visual interpretation. In areas with historical rice distribution maps, we used all three data sources (1), (2), and (3) for visual interpretation of rice and non-rice areas. In areas where historical maps were unavailable, we exclusively relied on data sources (1) and (2).

Figure R2-2 illustrates the reliability of visual interpretation using multiple data sources. The first row shows an overview of the entire study area, the second row presents zoomed-in "rice paddy areas," and the third row displays "non-rice crop areas." The combination of different data sources enables better differentiation between rice and other crops, ensuring the reliability of the independent validation sample set.

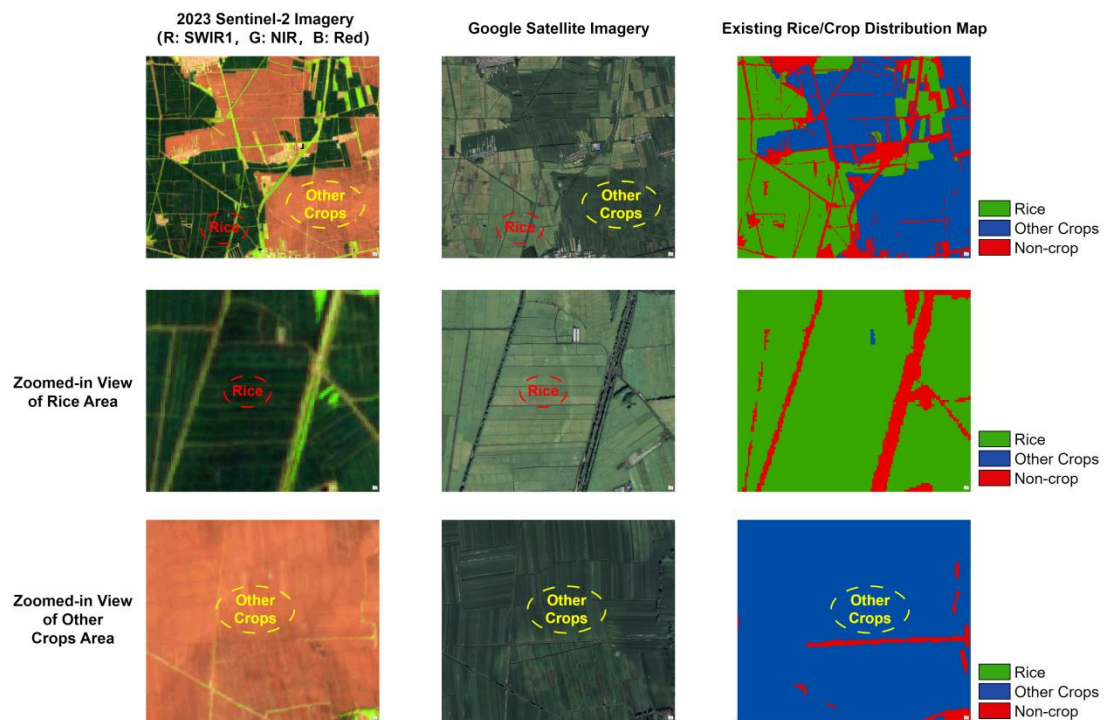

**Figure R2-2. Visual interpretation of rice and other crops using multiple data sources © Google Maps 2023.**

## 2. Application to Fragmented Rice Fields (Southern China)

Given that the method uses an optical-SAR adaptive fusion model, it may

**struggle to perform well in fragmented rice fields, especially in mountainous southern China. The small, scattered fields and complex terrain in this region could lead to errors in classification.**

**It is recommended to incorporate additional geographical data (e.g., terrain, soil types) to limit the model and improve its performance in such areas. The model's adaptability to these factors could significantly enhance its accuracy in more complex regions.**

**RESPONSE:** Thank you very much for your comment. We appreciate your valuable suggestion. It is a common observation that existing models and open datasets perform better in plain areas compared to fragmented rice fields in mountainous southern China, which is a well-documented phenomenon in existing research (Dong and Xiao, 2016; Pan et al., 2021; Huang et al., 2023; Shen et al., 2023).

In our study, we also incorporated DEM data to analyze the experimental results, as shown in Section 4.1 of the manuscript, which presents the distribution of rice across different slopes and elevations in East Asia.

As you mentioned, incorporating high-resolution soil type data could indeed improve the accuracy of rice mapping. However, current soil type data are generally available at coarser scales, lacking sufficient spatial detail to meet the requirements of 10-meter resolution rice mapping (Liu et al., 2022; Nachtergaele et al., 2023).

Once again, we sincerely appreciate your suggestion. Should higher-resolution or more accurate soil type data become available in the future, we will actively explore incorporating such data into our research to further enhance the model's performance.

### **3. Comparison with Existing Data**

**While the manuscript emphasizes the improved resolution of the rice map (10m), there are no comparisons made with prior datasets, particularly those from 2015-2021, which were at 500m resolution.**

**The authors should consider comparing the distribution and precision of the current data with these earlier datasets to demonstrate the advancements achieved through EARice10. This would help showcase the superior results of this study in a more concrete manner.**

**RESPONSE:** Thank you very much for your comment. We may not have been sufficiently detailed in our previous description. As shown in Figure 17 of the manuscript, we compared the spatial distribution of our dataset with an existing 500-meter dataset (APRA500 (500m) (Han et al., 2022)). The results indicate that the 10-meter resolution dataset offers a significant improvement in spatial detail.

Due to the severe mixed-pixel phenomenon in the 500-meter resolution imagery, direct quantitative comparison may not be entirely fair. Therefore, we primarily conducted a visual comparison to illustrate the differences. To more clearly demonstrate these differences, we have provided additional spatial distribution comparison maps (see Figure R2-3). From these maps, it is evident that EARice10 (10m resolution) shows substantial improvements in spatial detail and accuracy compared to APRA500 (500m), particularly in terms of field edges and the distribution of small-scale rice paddies.

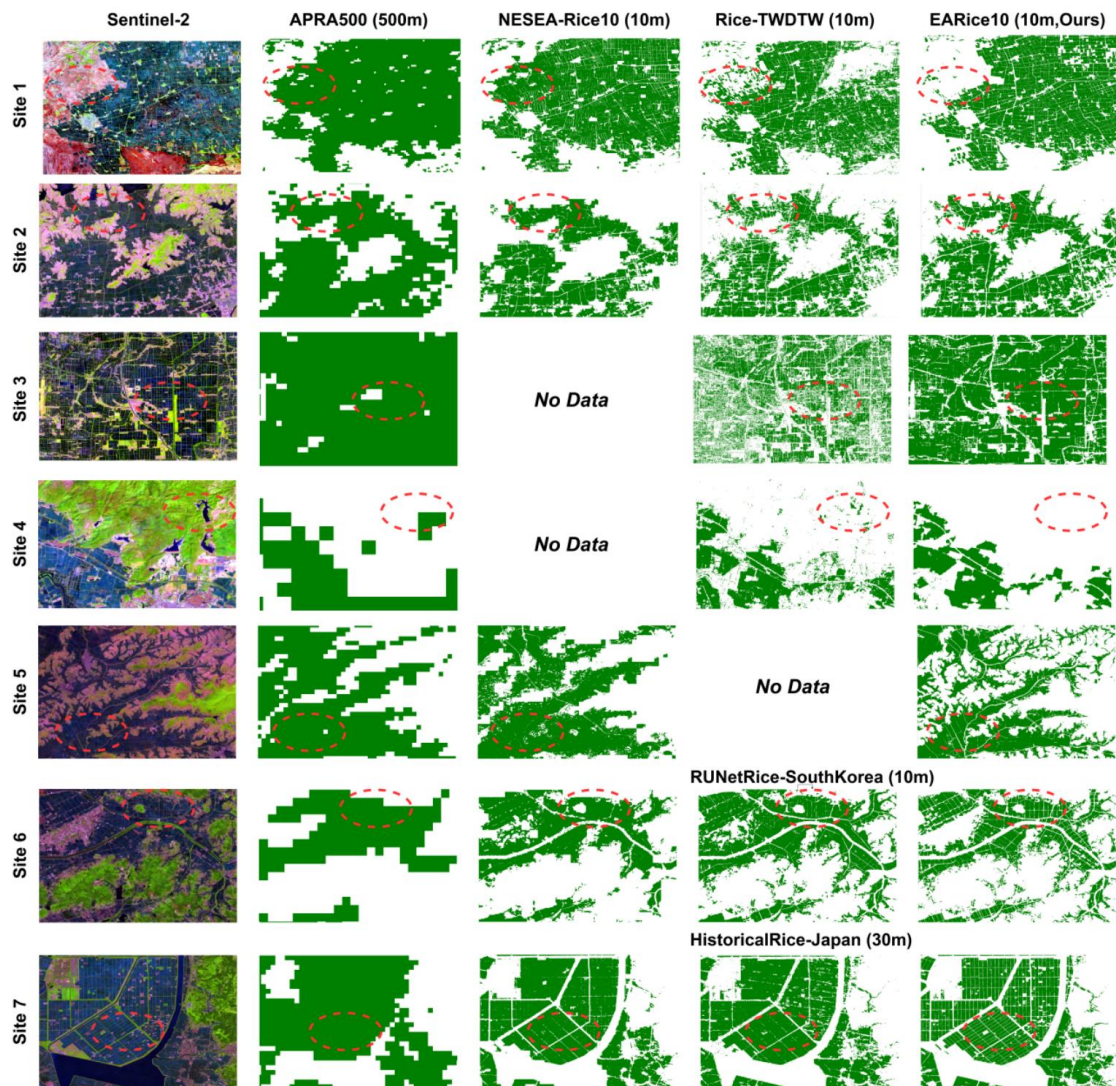

Figure 17. Detailed comparison of the EARice10 with five existing rice distribution maps. Site 1 and Site 2 are single-season rice planting areas in China (Heilongjiang and Liaoning Province), Site 3 is a mixed-season rice planting area in China (Hubei Province), Site 4 is a double-season rice planting area in China (Guangdong Province), and Sites 5-7 are single-season rice planting areas located in the Democratic People's Republic of Korea, the Republic of Korea, and Japan, respectively.



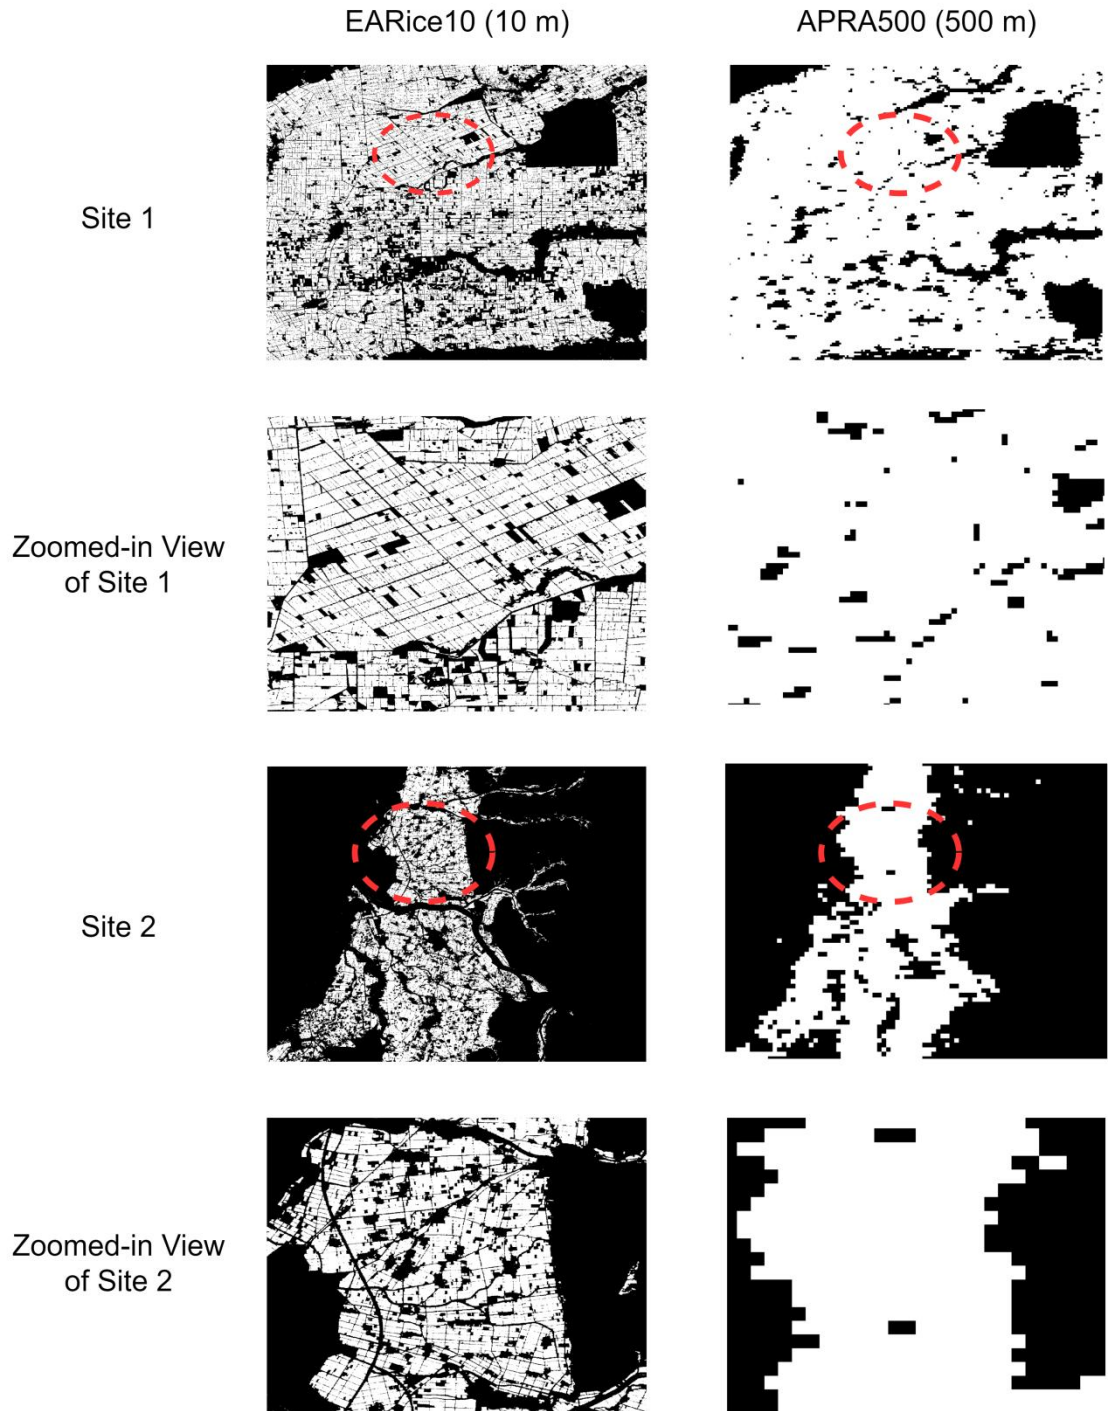

**Figure R2-3. Detail comparison of EARice10 (10m) and APRA500 (500m) datasets.**

#### **4. Specific Suggestions**

**In Equation (5), where the SAR features are normalized, the manuscript does**

**not clearly explain how the preset parameters A and B were derived. Are these values empirical, and if so, how were they selected? The paper should provide more justification or sensitivity analysis showing how different parameter values affect the results, particularly in regions like southern China where terrain and cropping patterns differ from other areas.**

**Additionally, if these parameters were tuned based on a specific region, would they need to be regionally adjusted when applying the method to other areas (e.g., South or Southeast Asia)? Clarifying this would improve the reproducibility of the approach.**

**RESPONSE:** Thank you very much for your comment. Thank you very much for your comment. We provide a detailed explanation here of how the empirical coefficients B and A in Equation (5) were determined.

Based on our previous research, the temporal statistical characteristics of the VH polarization from SAR data can effectively distinguish rice from other land cover types (Xu et al., 2021; Sun et al., 2023). Rice exhibits distinct ranges for various VH temporal statistical features (such as maximum, minimum, mean, and variance). To quantify the SRMI (SAR-based rice mapping index) into a rice probability, we normalize these four temporal features using Equation (5), where coefficients A and B are employed to define the lower and upper bounds for the normalized features. The criteria for determining A and B are to ensure that the SRMI values range between 0 and 1, while maintaining the ability to differentiate rice from other land cover types. The specific values of A and B were determined based on an extensive analysis of the VH temporal curves and statistical characteristics of rice from different regions, resulting in the most suitable empirical parameters for rice identification in East Asia.

Figures R2-4 to R2-9 illustrate the VH temporal curves and statistical features of rice across different countries and cropping systems in East Asia. As shown, the maximum backscatter coefficient ( $\sigma_{max}^0$ ) for rice generally does not exceed -10 dB, and the closer the value is to -10 dB, the higher the probability that the plot is rice. The

minimum backscatter coefficient ( $\sigma_{min}^0$ ) for rice is typically around -25 dB. The mean backscatter coefficient ( $\sigma_{mean}^0$ ) for rice usually ranges between -10 dB and -20 dB, with values closer to -20 dB indicating a higher probability of being rice. The variance of the backscatter coefficient ( $\sigma_{var}^0$ ), for rice and other agricultural fields, is generally above -10. Based on this analysis of rice's temporal statistical features across different regions of East Asia, we determined that for  $\sigma_{max}^0$  and  $\sigma_{min}^0$ , A is set to -25 and B to -10. For  $\sigma_{mean}^0$ , A is set to -20 and B to -10, and for  $\sigma_{var}^0$ , A is set to 0 and B to 10. After normalization using these parameters, Equation (6) yields SRMI values that mostly cluster around 0.6. With a threshold  $\beta = 0.5$ , rice and other land cover types can be effectively distinguished, as shown in Figure R2-10.

Furthermore, when applying these empirical parameters A and B to other regions, such as Southeast Asia, we found that the SRMI calculation also showed some effectiveness. Figures R2-11 and R2-12 present the results of rice mapping in Vietnam using this index, demonstrating that the threshold of 0.5 can still effectively distinguish rice from other land cover types. For regions outside of East Asia, we recommend fixing the empirical parameters A and B, while analyzing the specific distribution of SRMI for rice in that region to determine the most suitable threshold, thereby maximizing classification accuracy.

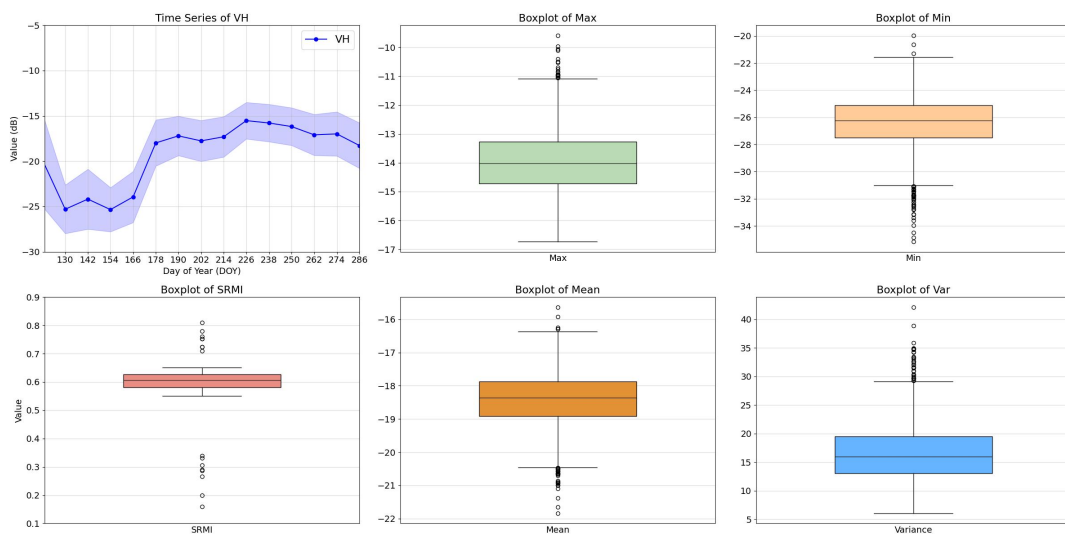

**Figure R2-4. VH temporal backscatter curves and statistical features of rice in Heilongjiang, China**

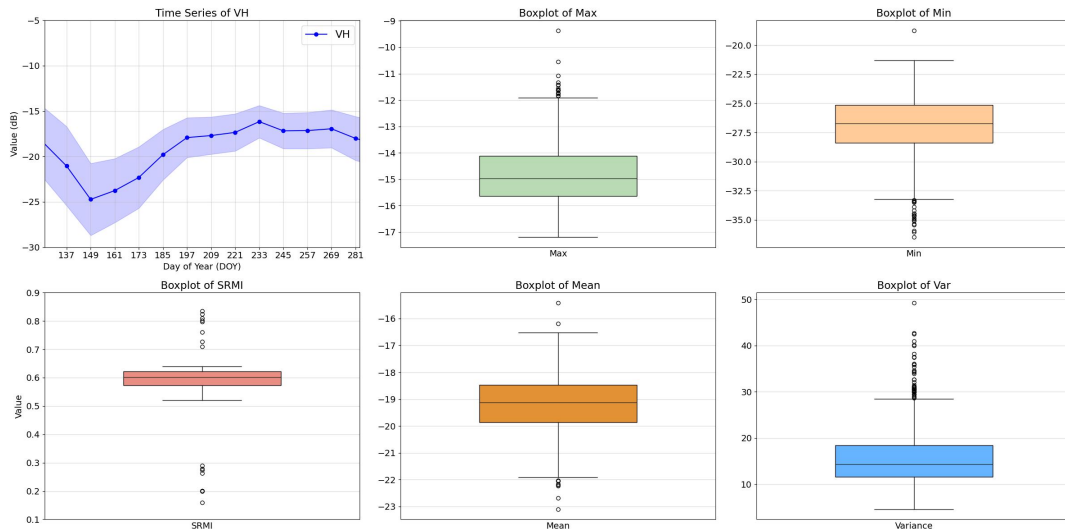

**Figure R2-5. VH temporal backscatter curves and statistical features of rice in the Democratic People's Republic of Korea**

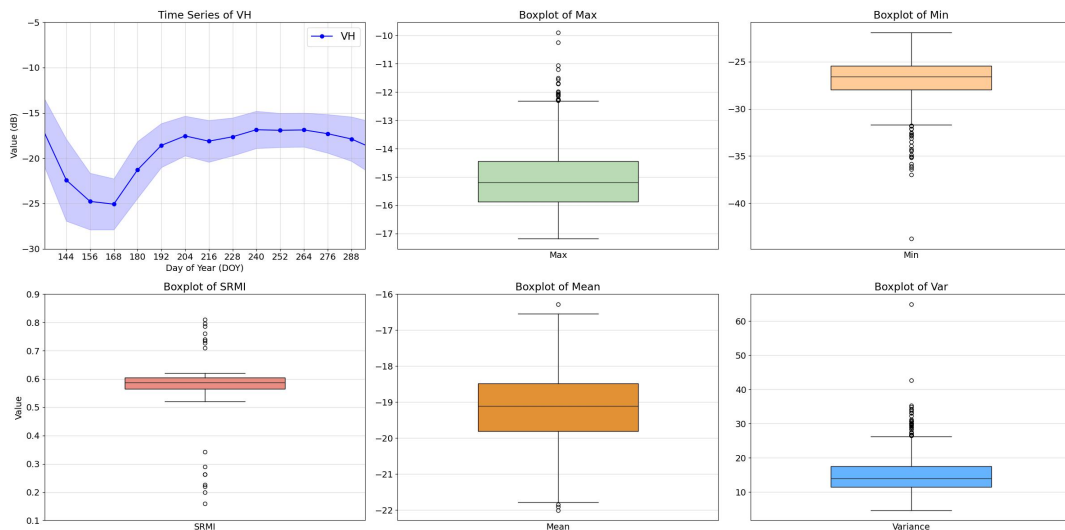

**Figure R2-6. VH temporal backscatter curves and statistical features of rice in the Republic of Korea**

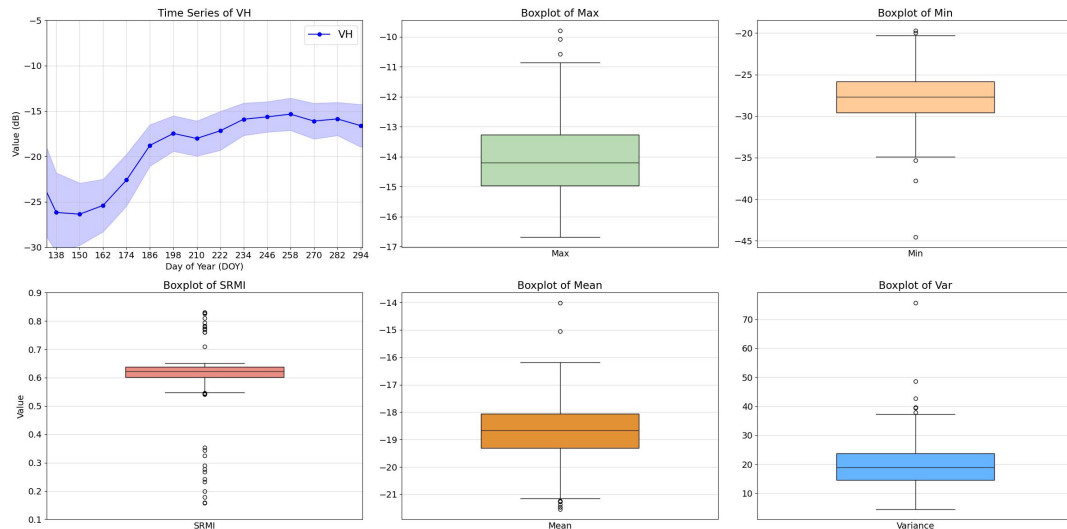

**Figure R2-7. VH temporal backscatter curves and statistical features of rice in Japan**

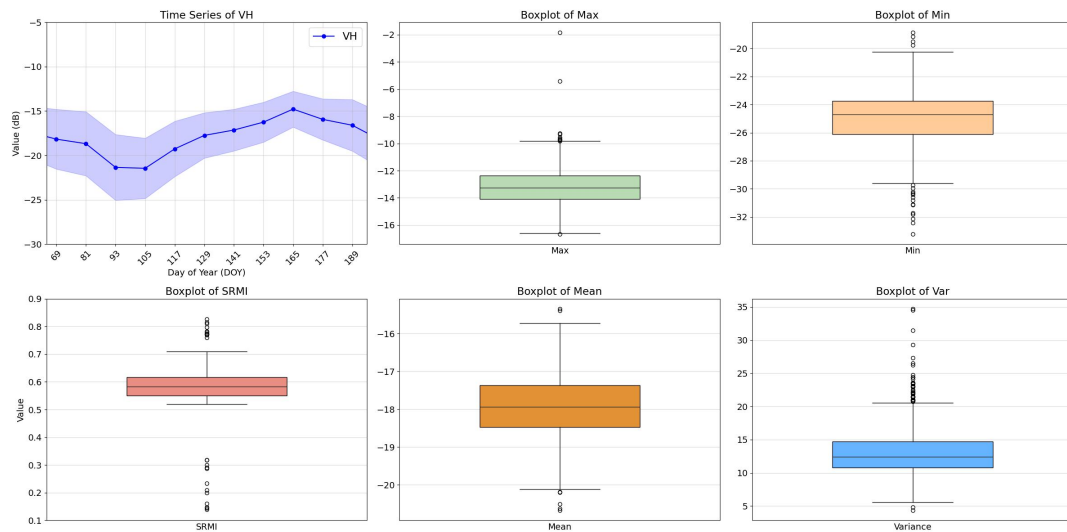

**Figure R2-8. VH temporal backscatter curves and statistical features of early rice in Guangdong, China**

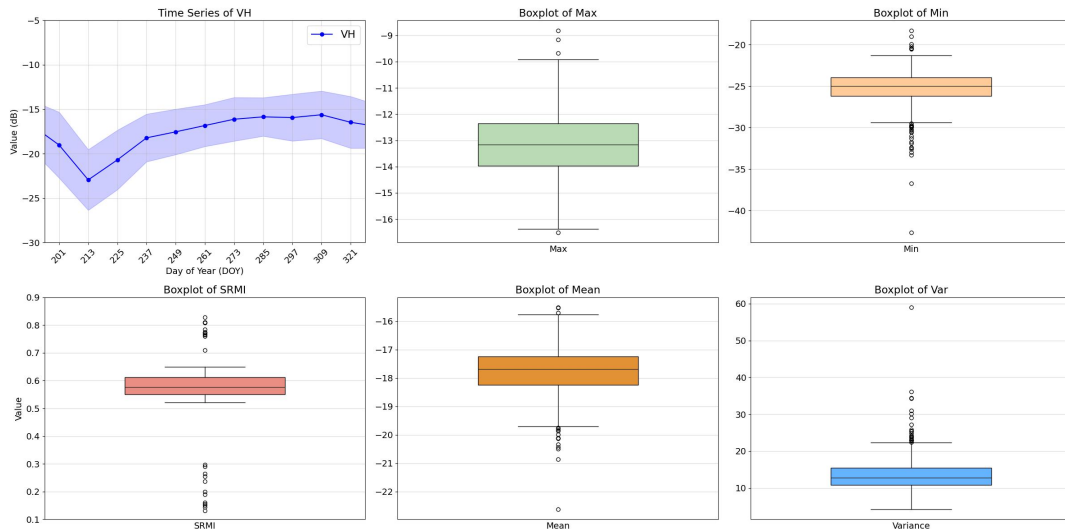

**Figure R2-9. VH temporal backscatter curves and statistical features of late rice in Guangdong, China**

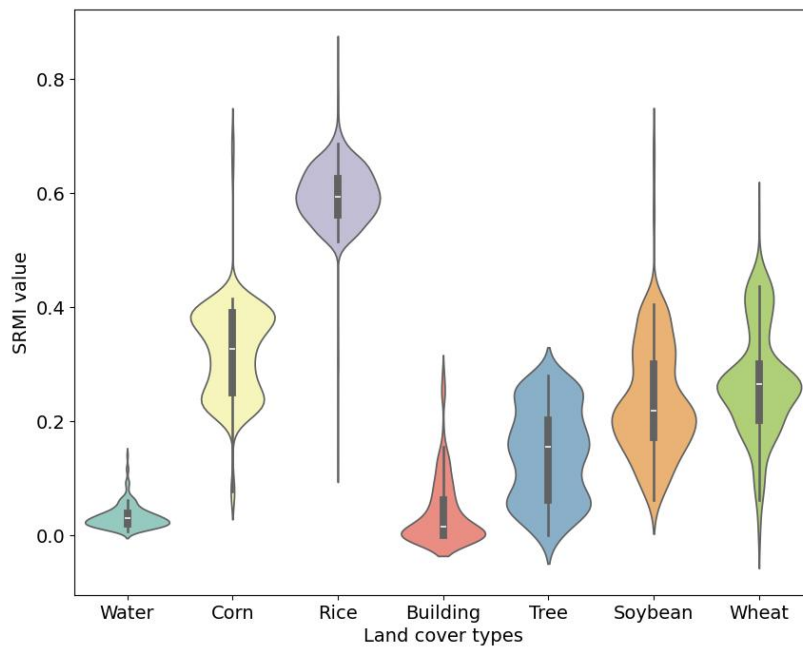

**Figure R2-10. SRMI values for different land cover types in East Asia**

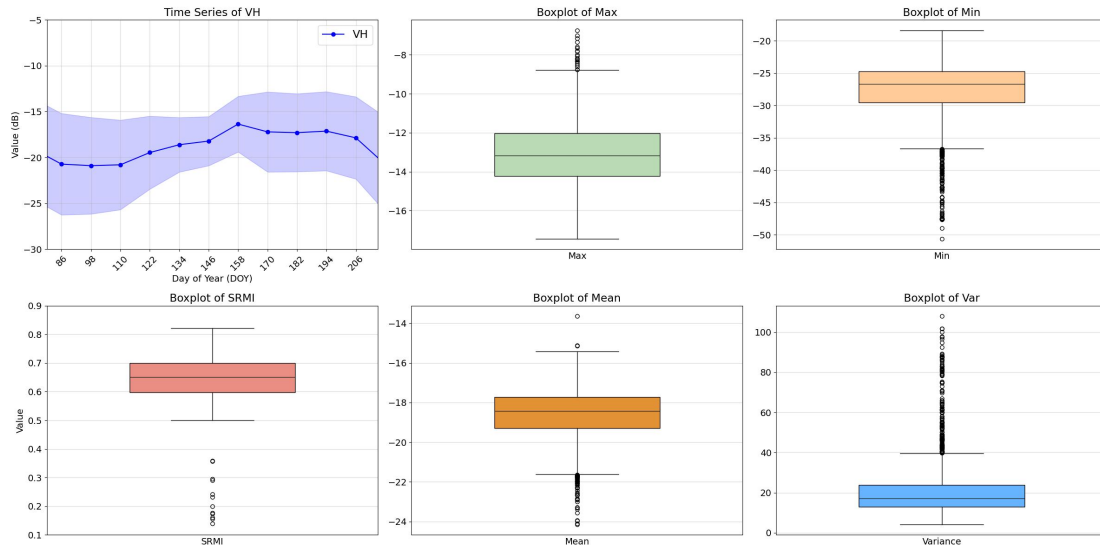

**Figure R2-11. VH temporal backscatter curves and statistical features of rice in Vietnam**

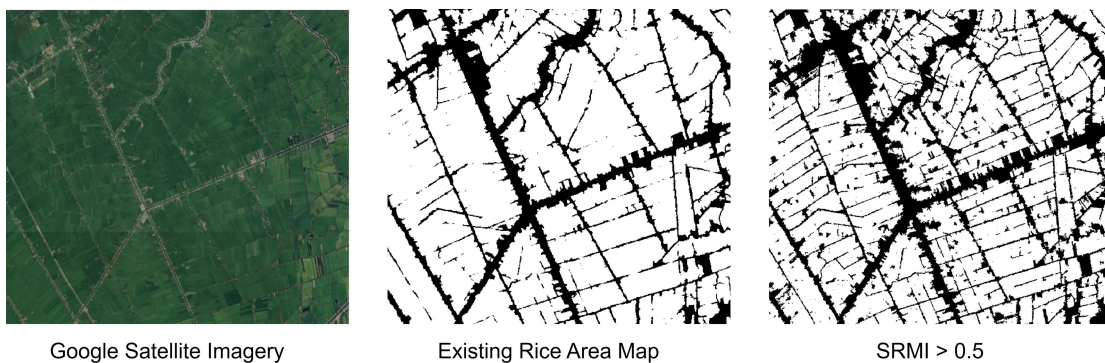

**Figure R2-12. Rice distribution mapping in Vietnam using SRMI**

### 5. SRMI Threshold

The SRMI threshold for rice classification (set at 0.5) may not be flexible enough to handle the variability in terrain and crop conditions, particularly in fragmented and mountainous regions. It would be useful to conduct a sensitivity analysis on this threshold to see how changes in SRMI values affect classification accuracy in different landscapes. This analysis could highlight the robustness of the SRMI index across diverse geographic regions.

**RESPONSE:** Thank you very much for your comment.

As shown in the box plot in Figure 4 of the manuscript, the SRMI values are distributed differently among various land cover types, and the results indicate that a threshold of 0.5 can effectively distinguish rice from other land cover types. Additionally, we performed extensive testing and validation of rice fields in multiple countries (e.g., Heilongjiang and Guangdong in China, Japan, the Republic of Korea, and the Democratic People's Republic of Korea) and across different landscapes, including plains and mountainous regions. The results in Figure 5 of the manuscript clearly demonstrate the application of SRMI in different regions. Although classification accuracy varies depending on terrain conditions, the threshold of 0.5 remains consistently effective in distinguishing rice from non-rice plots in most cases, showcasing the robustness of the SRMI index.

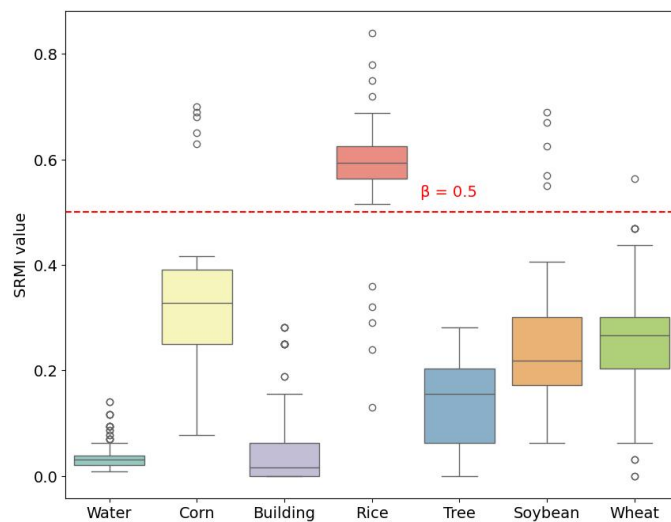

**Figure 4. The box plot of the SRMI value of land cover types.**



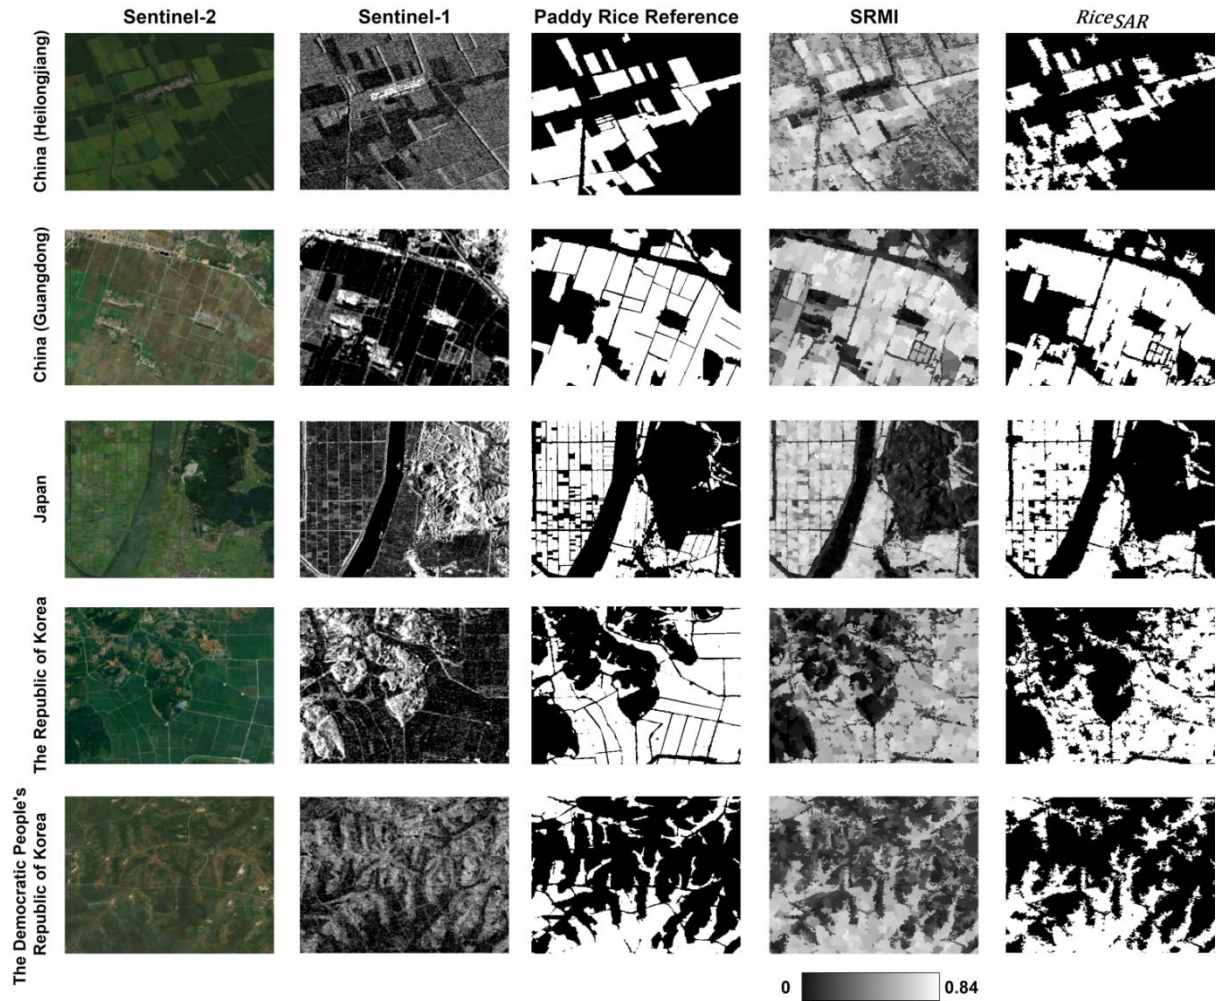

**Figure 5. Demonstrations of rice candidate areas in different regions based on SRMI.**

## **6. Random Forest Model Training**

In Section 3.2, where multiple Random Forest models are trained for each semi-monthly image, there is a risk of over-complicating the model and losing temporal dynamics, as indicated by Figure 6. The paper should clarify why it was necessary to train multiple models rather than aggregating data over a longer period to maintain temporal information.

This section could also benefit from a discussion on overfitting risks, particularly in fragmented regions where training data may be more heterogeneous.

It is recommended to test a more streamlined approach that reduces the number

of models and retains more temporal information to potentially improve classification performance, especially in areas with sparse data coverage.

**RESPONSE:** Thank you very much for your comment.

Traditional methods typically classify time-series features extracted from multi-temporal Sentinel-2 images using a single RF model, which requires each pixel to have complete observations across the entire time series. In past rice mapping methods, cloud-affected areas were interpolated after cloud removal to ensure that each pixel had a complete time series (You and Dong, 2020; You et al., 2021; Zhang et al., 2023). However, in regions with severe cloud cover (e.g., coastal areas or southern China), the spatial and temporal distribution of clouds is highly variable (as shown in the red squares in Figure 7). Interpolation methods often fail to fully restore spectral time-series features, and may introduce inaccurate information that negatively impacts classification accuracy.

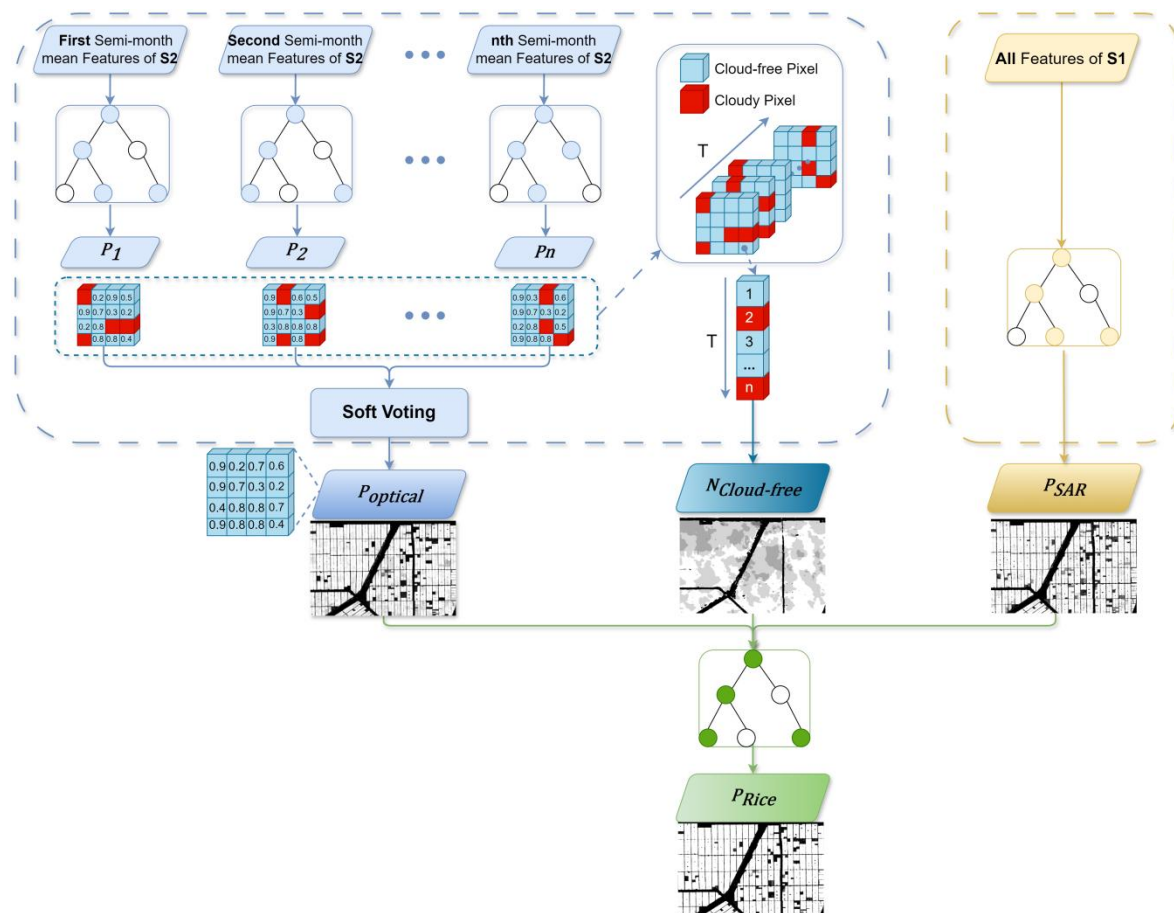

**Figure 7. Structure of the optical-SAR adaptive fusion model using optical and**

## **SAR data.**

Our proposed optical-SAR adaptive fusion model is designed to leverage the respective strengths of optical and SAR data. Even though temporal dynamic information from Sentinel-2 may be incomplete at certain time points, its spectral features at individual time points can still provide enough information to distinguish rice from other land cover types (Zhang et al., 2021; Zhang et al., 2023). Therefore, after removing cloud effects, we did not interpolate cloud-covered areas. Instead, we trained multiple RF models for each semi-monthly composite Sentinel-2 image. The results of the RF models were then combined through weighted voting (Equation 10), allowing us to generate rice classification probabilities based on optical data without relying on a complete time series.

The advantages of the optical-SAR adaptive fusion model designed for Sentinel-2 data are as follows:

- (1) **Avoiding interpolation errors:** Interpolation in cloud-covered areas is often inaccurate. Our model directly ignores NoData values in these regions, avoiding the introduction of artificial temporal information.
- (2) **Maximizing the use of optical features:** Despite incomplete temporal dynamic information, the rich spectral features of Sentinel-2 provide sufficient information for accurate classification, even at individual time points. By voting on outputs from different time points, we further improve classification accuracy.
- (3) **Avoiding the impact of the "Hughes phenomenon":** Multi-temporal data with high feature dimensionality can lead to the "Hughes phenomenon," where classification accuracy decreases as dimensionality increases. Our model avoids this problem by processing each time point separately.

To validate the advantages of the optical-SAR adaptive fusion model in real-world applications, we selected Shanwei City in Guangdong Province, southern China, as a study area. This region is heavily affected by cloud cover and presents a challenging classification environment, making it an ideal test case for evaluating the model's

robustness in difficult conditions.

We compared four different approaches:

- (1) **Our Model (S1+S2)**: An integrated model combining optical (Sentinel-2) and SAR (Sentinel-1) data without interpolating cloud-covered areas.
- (2) **RF (S1)**: A random forest model trained using only Sentinel-1 SAR time-series data.
- (3) **RF (S2)**: A random forest model trained using only Sentinel-2 optical time-series data, with cloud-covered areas interpolated.
- (4) **RF (S1+S2)**: A random forest model combining Sentinel-1 and interpolated Sentinel-2 time-series data.

As shown in Figure R2-13, our model outperformed the other three RF models in terms of user's accuracy (91.89%), producer's accuracy (90.67%), and overall accuracy (91.33%). This demonstrates that combining optical and SAR data can significantly improve classification performance, especially in regions heavily affected by cloud cover.

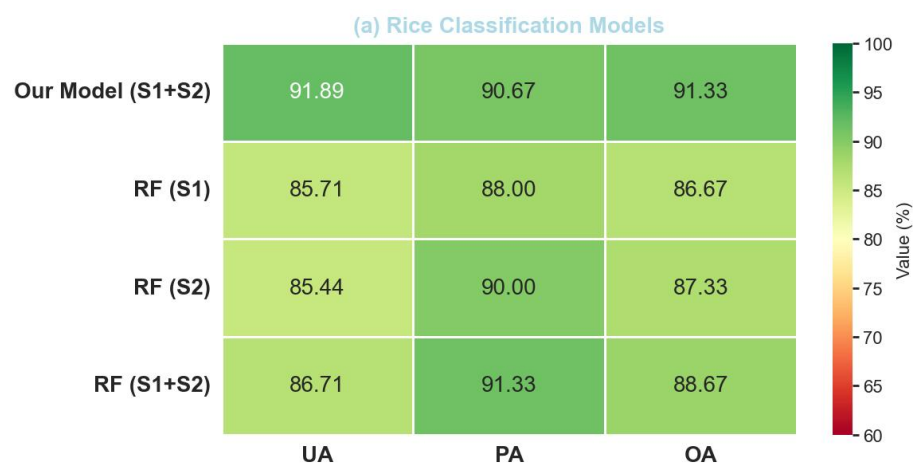

**Figure R2-13. Comparison of the Optical-SAR adaptive fusion model with individual RF models.**

## 7. Validation and Field Survey Data

**The validation data is largely based on visual interpretation. However, the manuscript lacks details on how this interpretation was conducted, especially in regions with fragmented rice fields. Providing more concrete evidence, such as field survey data or ground truth photographs, would strengthen the validation process.**

**The authors should also clarify the proportion of samples that were obtained through actual field surveys versus visual interpretation.**

**Furthermore, it would be useful to provide accuracy metrics for different regions, especially comparing flat and mountainous areas, to demonstrate the model's robustness across diverse landscapes.**

**RESPONSE:** Thank you very much for your comment.

As mentioned in Response 1, our independent validation sample set was generated through a combination of field surveys and rigorous visual interpretation. The visual interpretation was cross-validated using multiple data sources (e.g., Sentinel-2 optical imagery, Google high-resolution imagery, and existing historical rice distribution maps). Visual interpretation is a widely applied and reliable method when field survey data is limited, and many related studies have validated its effectiveness and accuracy in rice distribution mapping (Zhang et al., 2023; Li et al., 2024a; Li et al., 2024b). Through multi-source data validation and cross-comparison, we were able to obtain high-quality independent validation samples, ensuring their accuracy in both spatial distribution and land cover type. Thus, these independent validation samples effectively verified the reliability of the final mapping results.

Field survey points accounted for approximately 18.35% of the total samples in China and 11.56% of the total samples across East Asia. Additionally, ground truth photos of rice fields from Heilongjiang, Anhui, and Guangdong were provided to further demonstrate the reliability of the sample set.

Once again, thank you for pointing out this issue. We have revised Section 2.3 to further improve clarity:

**Line 151, Page 6**

...To assess the accuracy of the generated rice map, an independent validation sample set containing 91,320 samples (46,908 rice and 44,412 non-rice) was constructed through field surveys and visual interpretation, with field survey points accounting for 11.56% of the total samples, as shown in Figure 2...

**Line 169, Page 7**

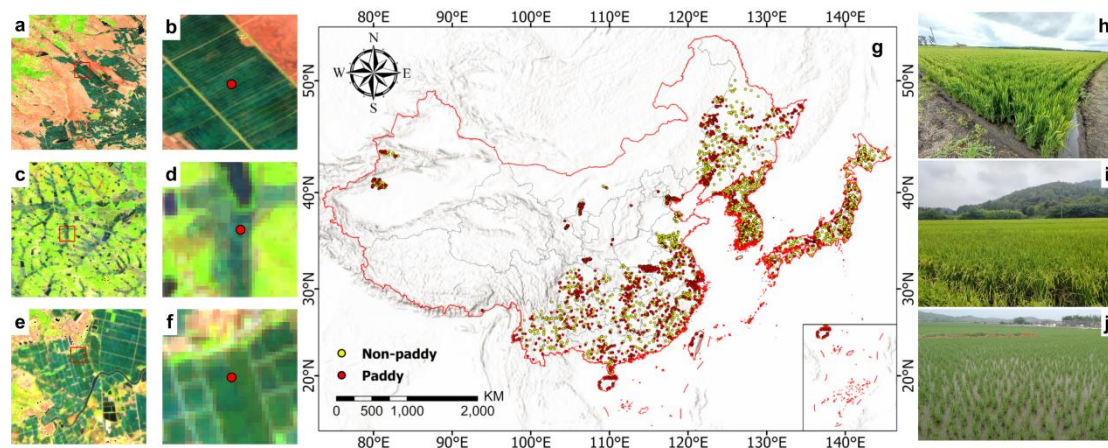

Figure 2. The Distribution of the validation sample set: (a, c, e) Sentinel-2 false-color images (R: SWIR1, G: NIR, B: Red); (b, d, f) enlarged local views of (a, c, e) respectively; (g) the distribution of rice and non-rice validation sample set. (h, i, j) ground truth photos of rice fields. Basemap sources for (g): Esri, TomTom, Garmin, FAO, NOAA, USGS, © OpenStreetMap contributors, and the GIS User Community.

Due to the lack of detailed terrain distribution data for East Asia, we followed the classification of cultivated land slopes specified by the Technical Regulations for the Third National Land Survey of China published by the Ministry of Natural Resources of China. Regions with slopes  $\leq 2^\circ$  were defined as plains, and corresponding rice fields were classified as flatland rice cultivation; regions with slopes  $> 2^\circ$  were defined as mountainous rice fields (including terraced and sloped areas). Figures R2-14 and

R2-15 show the proportion of rice area and classification accuracy under different slopes across various countries.

As seen in Figure R2-15, while rice classification accuracy in flat areas is higher than in mountainous regions, the accuracy for all countries across different terrains remains above 88%, demonstrating the model's robustness in diverse geographic conditions.

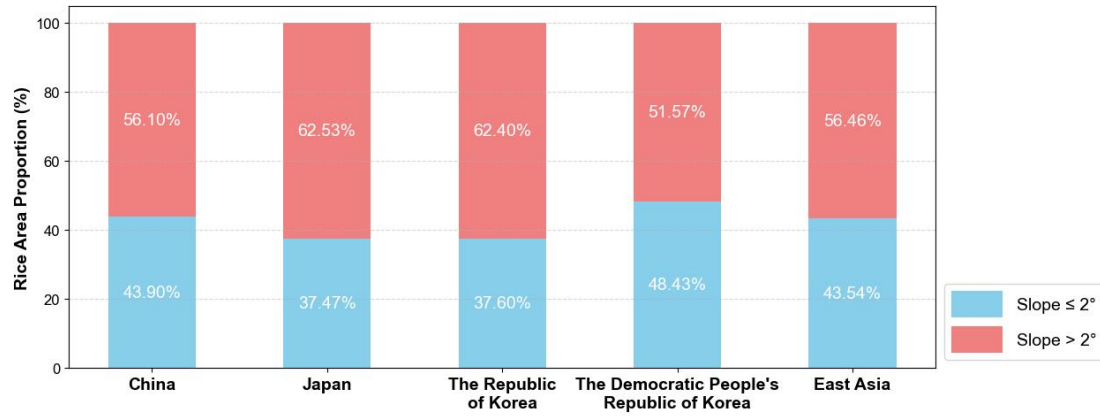

Figure R2-14. Proportion of rice area under different slopes in various countries.

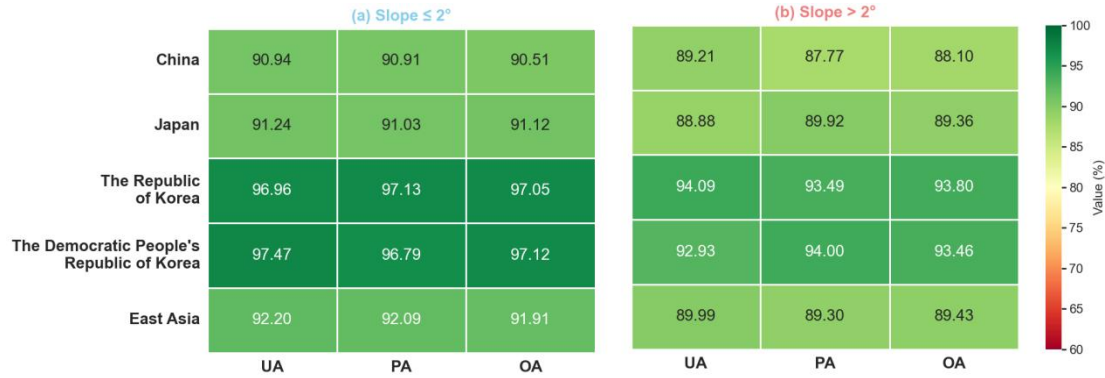

Figure R2-15. Classification accuracy under different slopes in various countries.

## References

- Dong, J. and Xiao, X.: Evolution of regional to global paddy rice mapping methods: A review, *ISPRS Journal of Photogrammetry and Remote Sensing*, 119, 214-227, 10.1016/j.isprsjprs.2016.05.010, 2016.
- Han, J., Zhang, Z., Luo, Y., Cao, J., Zhang, L., Zhuang, H., Cheng, F., Zhang, J., and Tao, F.: Annual paddy rice planting area and cropping intensity datasets and their dynamics in the Asian monsoon region from 2000 to 2020, *Agricultural Systems*, 200, 10.1016/j.agsy.2022.103437, 2022.
- Huang, C., You, S., Liu, A., Li, P., Zhang, J., and Deng, J.: High-Resolution National-Scale Mapping of Paddy Rice Based on Sentinel-1/2 Data, *Remote Sensing*, 15, 10.3390/rs15164055, 2023.
- Li, H., Huang, J., Zhang, C., Ning, X., Zhang, S., and Atkinson, P. M.: An efficient and generalisable approach for mapping paddy rice fields based on their unique spectra during the transplanting period leveraging the CIE colour space, *Remote Sensing of Environment*, 313, 114381, 2024a.
- Li, L., Zhou, D., Liu, K., Shi, T., Xie, C., Wang, S., Li, H., Dong, G., and Li, X.: Optimizing Rice Field Mapping in the Northern Region of China: An Asynchronous Flooding Signal and Object-Based Method, *IEEE Journal of Selected Topics in Applied Earth Observations and Remote Sensing*, 1-16, 10.1109/jstars.2024.3357141, 2024b.
- Liu, F., Wu, H., Zhao, Y., Li, D., Yang, J.-L., Song, X., Shi, Z., Zhu, A.-X., and Zhang, G.-L.: Mapping high resolution national soil information grids of China, *Science Bulletin*, 67, 328-340, 2022.
- Nachtergaele, F., van Velthuisen, H., Verelst, L., Wiberg, D., Henry, M., Chiozza, F., Yigini, Y., Aksoy, E., Batjes, N., and Boateng, E.: Harmonized world soil database version 2.0, FAO2023.



Pan, B., Zheng, Y., Shen, R., Ye, T., Zhao, W., Dong, J., Ma, H., and Yuan, W.: High Resolution Distribution Dataset of Double-Season Paddy Rice in China, *Remote Sensing*, 13, 10.3390/rs13224609, 2021.

Shen, R., Pan, B., Peng, Q., Dong, J., Chen, X., Zhang, X., Ye, T., Huang, J., and Yuan, W.: High-resolution distribution maps of single-season rice in China from 2017 to 2022, *Earth System Science Data*, 15, 3203-3222, 10.5194/essd-15-3203-2023, 2023.

Sun, C., Zhang, H., Xu, L., Ge, J., Jiang, J., Zuo, L., and Wang, C.: Twenty-meter annual paddy rice area map for mainland Southeast Asia using Sentinel-1 synthetic-aperture-radar data, *Earth System Science Data*, 15, 1501-1520, 10.5194/essd-15-1501-2023, 2023.

Xu, L., Zhang, H., Wang, C., Wei, S., Zhang, B., Wu, F., and Tang, Y.: Paddy Rice Mapping in Thailand Using Time-Series Sentinel-1 Data and Deep Learning Model, *Remote Sensing*, 13, 3994, 10.3390/rs13193994, 2021.

Zhang, C., Zhang, H., and Tian, S.: Phenology-assisted supervised paddy rice mapping with the Landsat imagery on Google Earth Engine: Experiments in Heilongjiang Province of China from 1990 to 2020, *Computers and Electronics in Agriculture*, 212, 108105, 2023.

Zhao, R., Li, Y., and Ma, M.: Mapping Paddy Rice with Satellite Remote Sensing: A Review, *Sustainability*, 13, 10.3390/su13020503, 2021.
